# Supplementary material for: Hydrophobic polypyrroles synthesized by aqueous chemical oxidative polymerization and their use as light-responsive liquid marble stabilizers
Source: Royal Society of Chemistry journal article supplement (doi:10.1039/c7py00158d), 2017-01-01
Supplement: c7py00158d1.pdf [file c7py00158d1.pdf]

## Supporting Information

*Polymer Chemistry* manuscript

‘Hydrophobic polypyrrole synthesized by aqueous chemical oxidative polymerization  
and its use as a light-responsive liquid marble stabilizer’

by H. Kawashima *et al.*

Corresponding author:

Dr. Syuji Fujii; syuji.fujii@oit.ac.jp

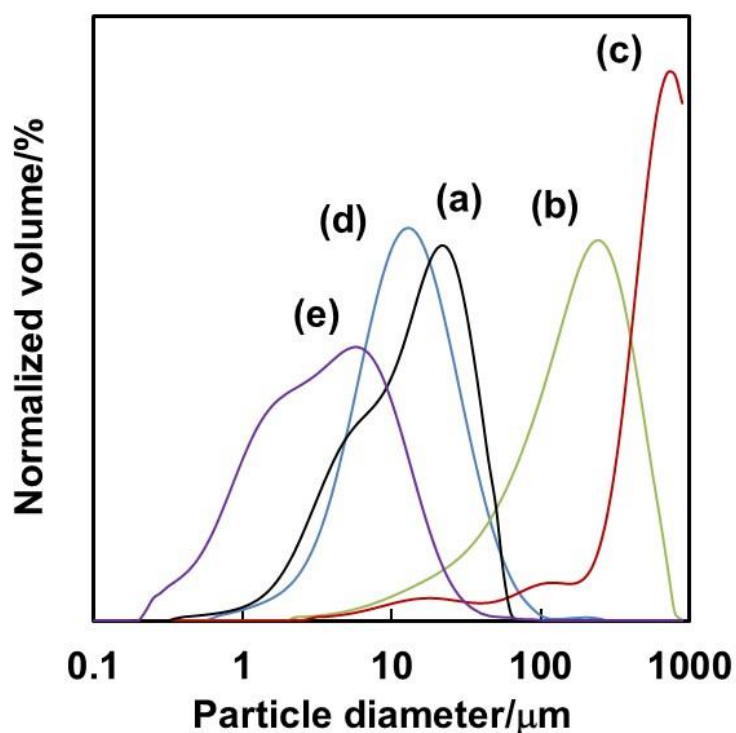

**Figure S1** Laser diffraction particle size distribution curves obtained for (a) PPy-C8F, (b) PPy-C6F, (c) PPy-C4F, (d) PPy-Cl and (e) dedoped PPy-C8F dispersed in aqueous medium.

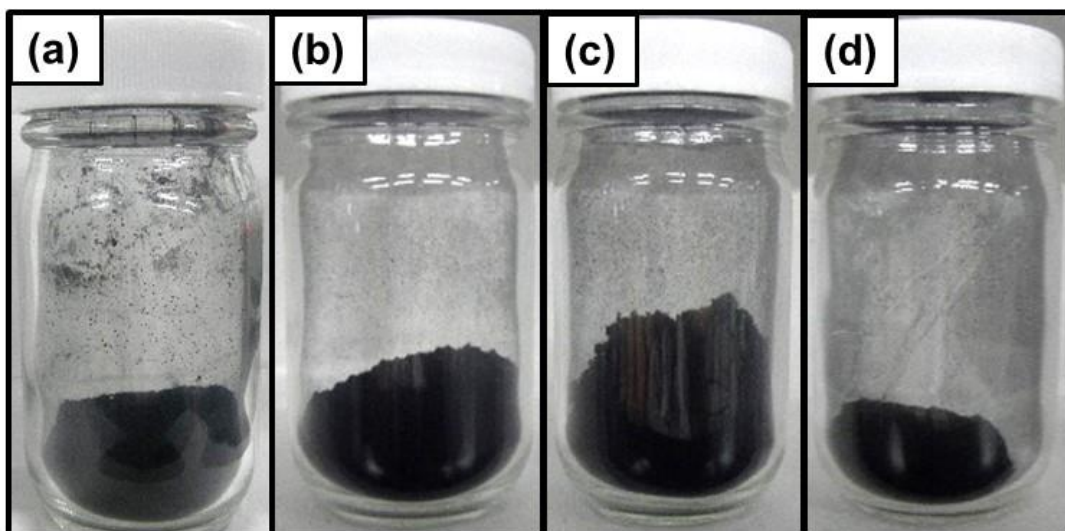

**Figure S2.** Digital images of (a) PPy-C8F, (b) PPy-C6F, (c) PPy-C4F and (d) PPy-Cl dried bulk powders.

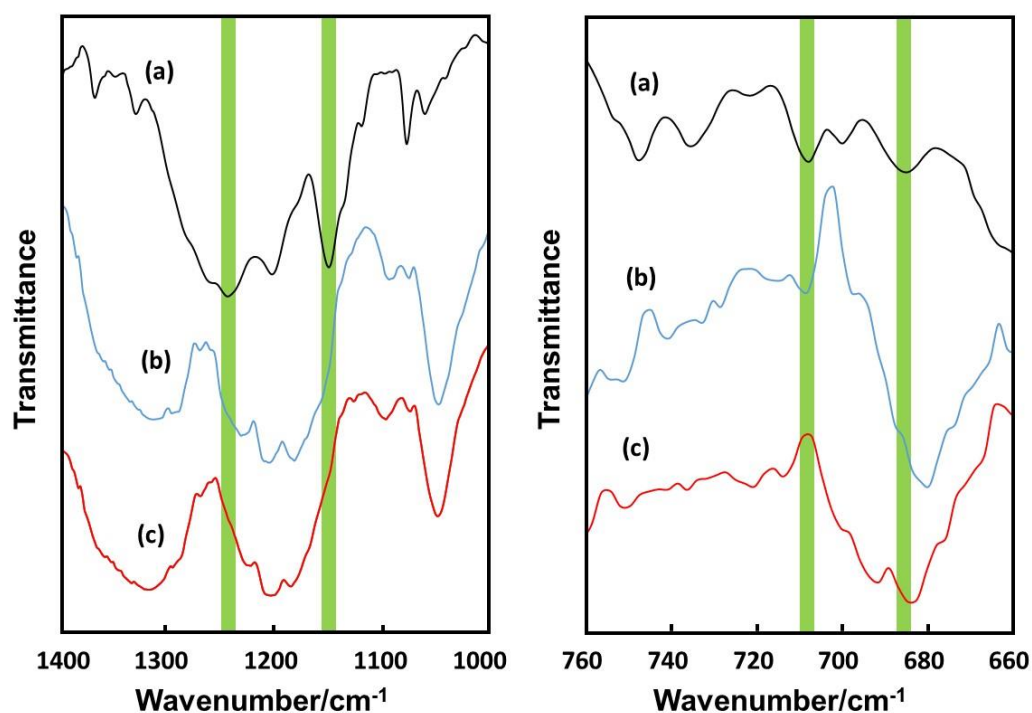

**Figure S3.** FT-IR spectra of (a) C8F dopant, (b) PPy-C8F and (c) PPy-Cl. The typical absorption bands for C8F due to the vibrations of the  $\text{-CF}_3$  and  $\text{-CF}_2\text{-}$  groups were observed in the spectrum of PPy-C8F as peaks and shoulders. (Lin-Vien, D. *The Handbook of Infrared and Raman Characteristic Frequencies of Organic Molecules*. Academic Press: San Diego, 1991.)

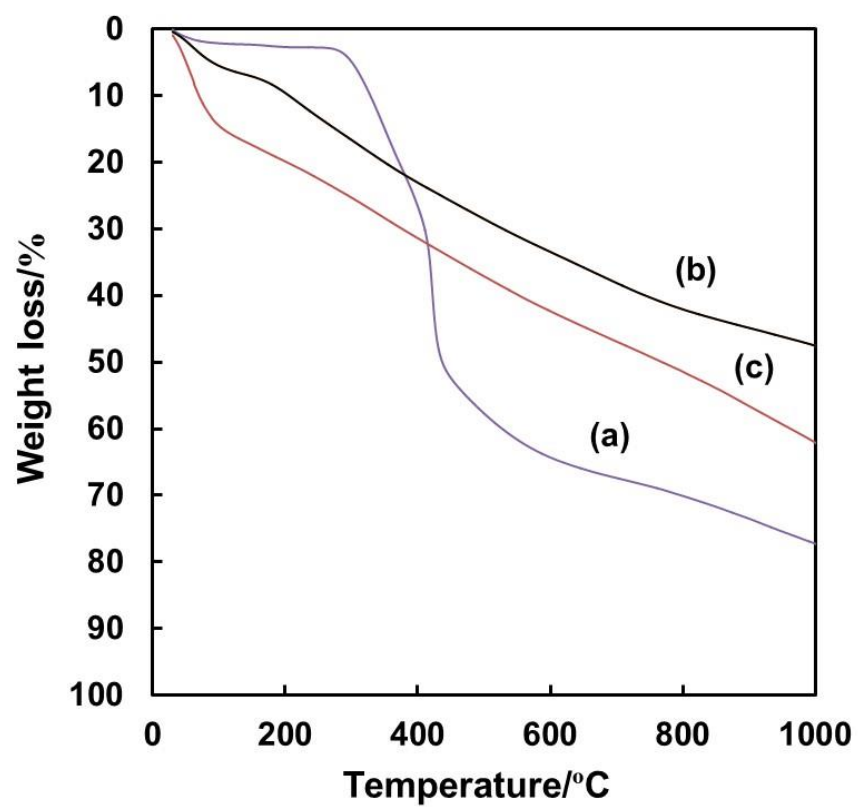

**Figure S4.** TG curves of (a) PPy-C8F, (b) PPy-Cl and (c) dedoped PPy-C8F bulk powders.

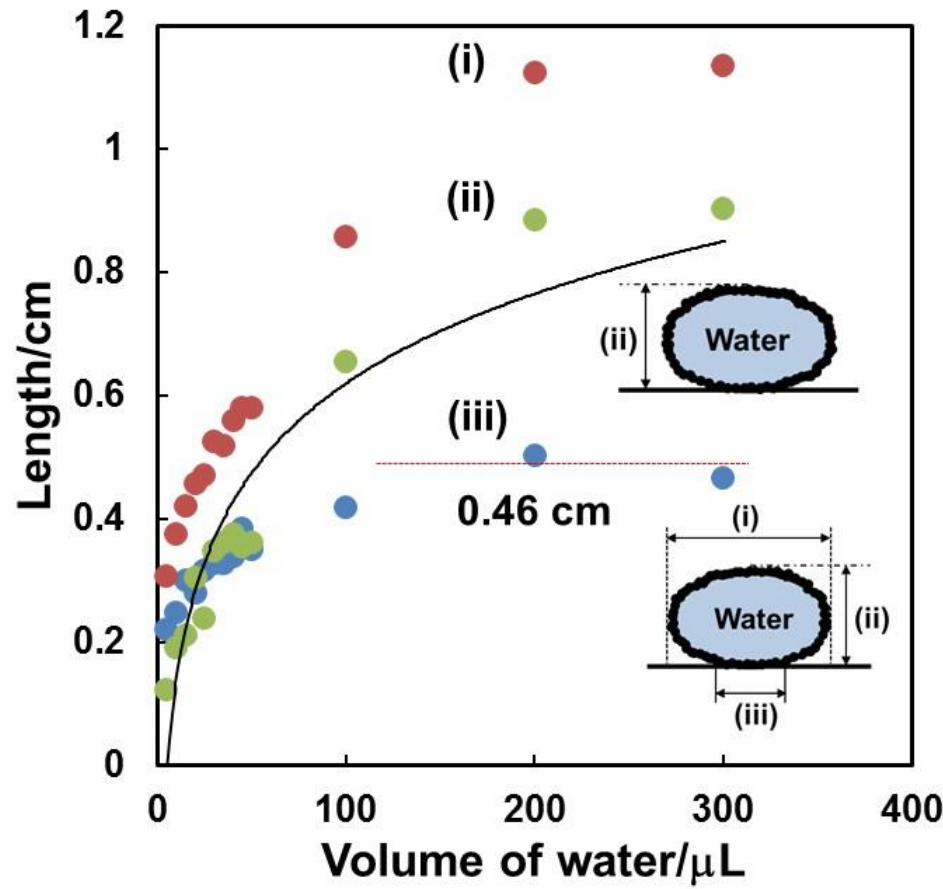

### Surface tension

$$a = 2 \sqrt{\frac{\gamma_{LV}}{\rho g}}$$

$$\gamma_{LV} = \frac{a^2}{4} \rho g$$

$$\gamma_{LV} = 52.5 \text{ mN/m}$$

### Capillary length

$$\kappa^{-1} = \sqrt{\frac{\gamma_{LV}}{\rho g}}$$

$$\kappa^{-1} = 0.23 \text{ cm}$$

$a$ : Diameter of height

$\rho$ : Density

$g$ : Gravitational acceleration

$\gamma_{LV}$ : Surface tension

$\kappa^{-1}$ : Capillary length

**Figure S5.** Diameter of the contact area, height and width of LMs placed on a glass substrate containing various volumes of water. The solid curve indicates the theoretical behavior under the assumption that water droplets have a perfectly spherical morphology independent of water volume.

**Table S1** Synthesis of PPy materials by aqueous chemical oxidative polymerization<sup>a)</sup>

| Ingredients                                        |     |       |     |     |     |
|----------------------------------------------------|-----|-------|-----|-----|-----|
| Pyrrole <sup>b, c)</sup>                           | (g) | 1     | 1   | 1   | 1   |
| Heptafluorooctane sulfonic acid <sup>b)</sup>      | (g) | 2.5   | -   | -   | -   |
| Tridecafluorohexane-1-sulfonic acid <sup>b)</sup>  | (g) | -     | 2.2 | -   | -   |
| Nonafluoro-1-butane sulfonic acid <sup>b)</sup>    | (g) | -     | -   | 1.5 | -   |
| FeCl <sub>3</sub> •6H <sub>2</sub> O <sup>c)</sup> | (g) | 9.4   | 9.4 | 9.4 | 9.4 |
| Water                                              | (g) | 103.8 | 100 | 100 | 100 |

<sup>a)</sup> 25 °C, 24 h, 500 rpm (magnetic stirring)

<sup>b)</sup> Pyrrole/dopant, 3/1 (molar ratio)

<sup>c)</sup> Pyrrole/FeCl<sub>3</sub>, 3/7 (molar ratio)
